# Supplementary material for: Protocol for Sampling Sequential Fin Spine Growth Intervals for Isotope Analysis in the Atlantic Bluefin Tuna
Source: Frontiers journal article supplement (doi:10.3389/fmars.2020.588651), 2020-12-17
Supplement: Table_1.DOCX [file Table_1.DOCX]

Table 1. Evaluation of Carbonate contents in fin spine bone powder

| **Mass 44 intensity** | **Weight of fin spine sample (µg)** | **Calculated weight of carbonate (ug)** | **Carbonate content (%)** |
| --- | --- | --- | --- |
| 4.7E-10 | 46 | 3 | 6.5 |
| 1.8E-09 | 193 | 11 | 5.7 |
| 1.0E-09 | 117 | 8 | 6.7 |
| 3.0E-09 | 262 | 16 | 6.0 |
| 3.5E-09 | 315 | 18 | 5.6 |
| 4.7E-09 | 440 | 22 | 5.1 |
